# Supplementary material
Source: Research Square preprint supplement (doi:10.21203/rs.3.rs-9354974/v1)
Supplement: Supplementary file 1 [file 4c4b58c6dca4ff85dd2eab1c.docx]

**Supplementary information**

Representative video recordings of cardiomyocyte beating have been provided. More are available under request.


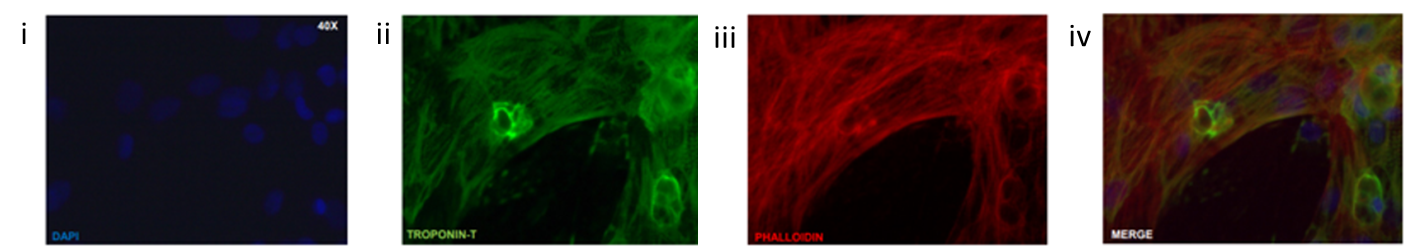


**Supplementary Figure 1:** Immunohistochemistry of cardiomyocytes stained for cardiac cell markers, i) DAPI, which was used as a counterstain for cell nuclei, ii) troponin-T, iii) phalloidin, iv) merged.


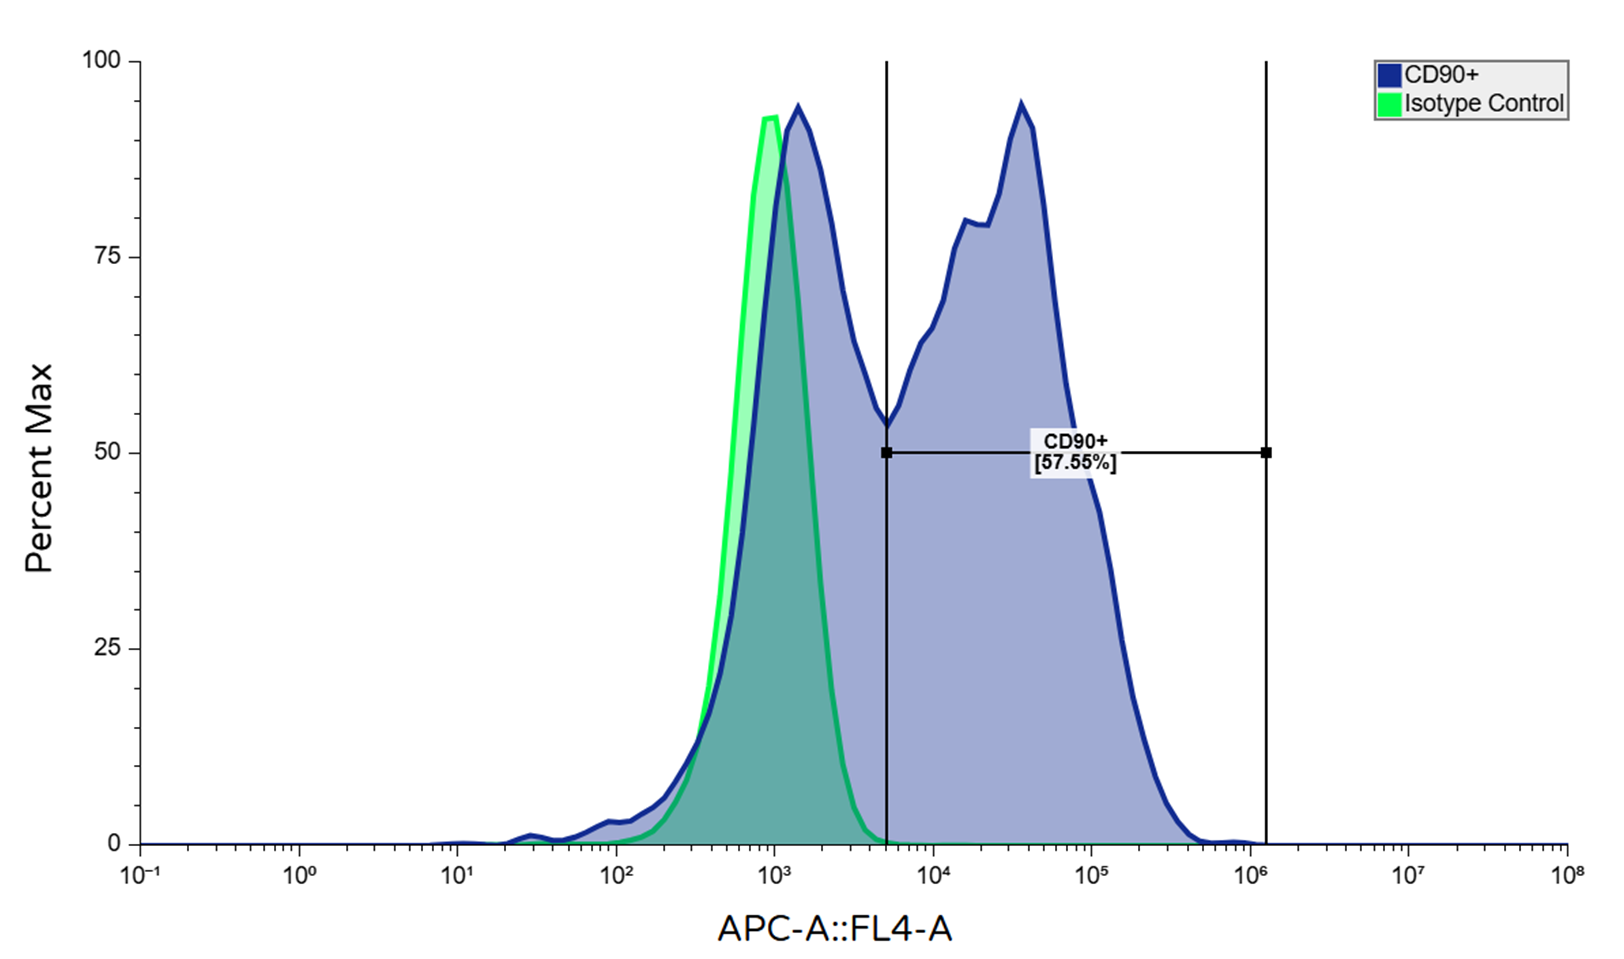
**Supplementary Figure 2:** Characterization of cardiac fibroblasts in terms of CD90 expression by flow cytometry.


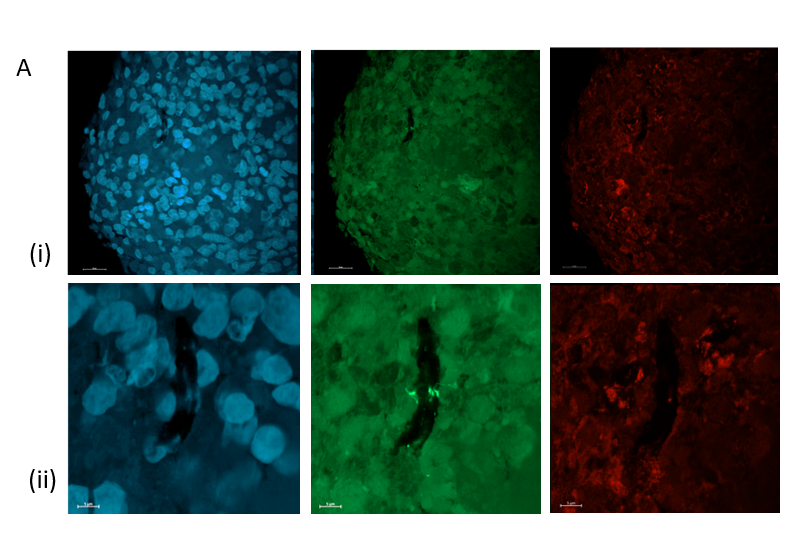


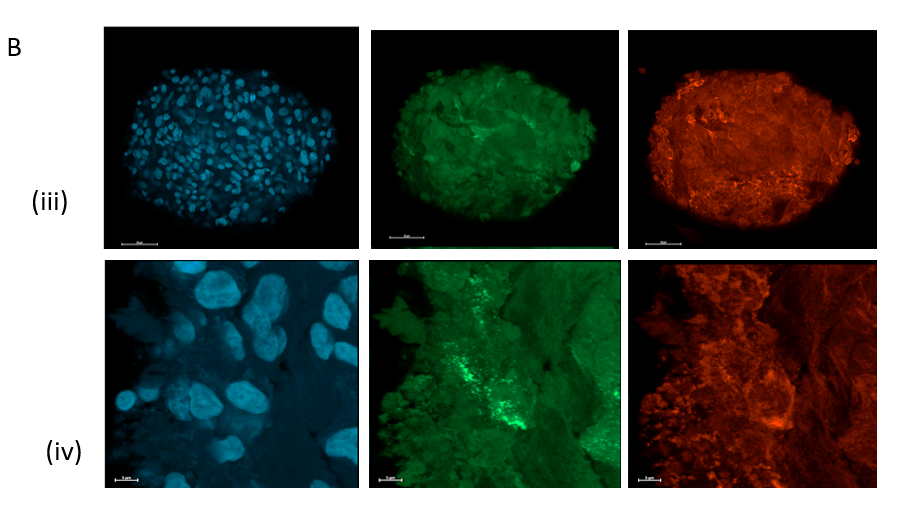


**Supplementary Figure 3:** Immunofluorescence staining of cardiomyocyte (A) and cardiomyocyte/cardiac fibroblast (B) spheroids of the separate channels with DAPI (blue), Cx43 (green), and α-actinin (red) captured with a 10×/0.3 NA (dry) lens (i and iii) and a section of the spheroids captured with a 20×/0.5 NA (dry) lens (ii and iv).


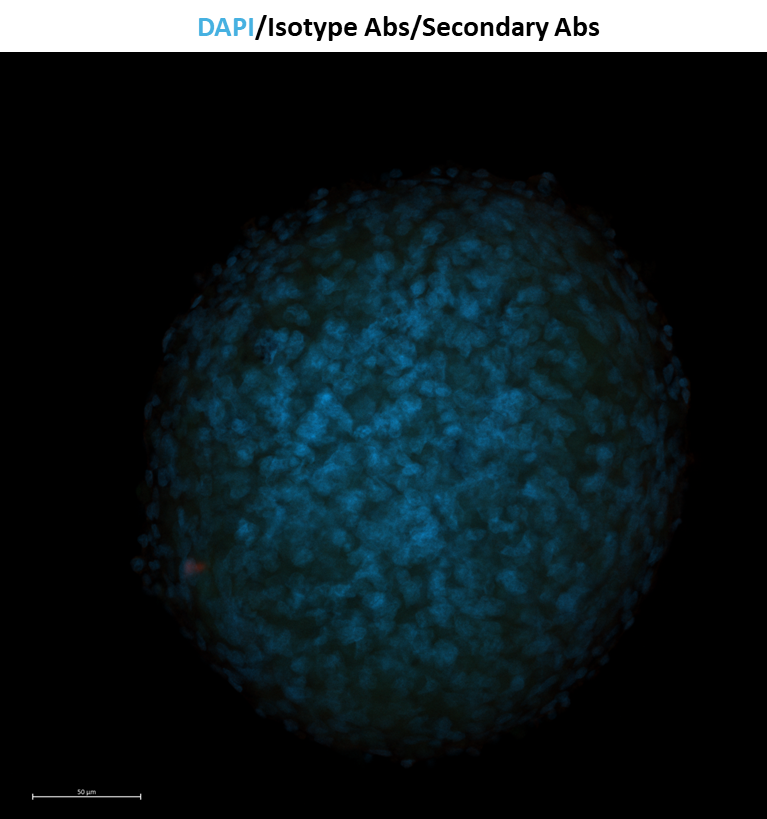

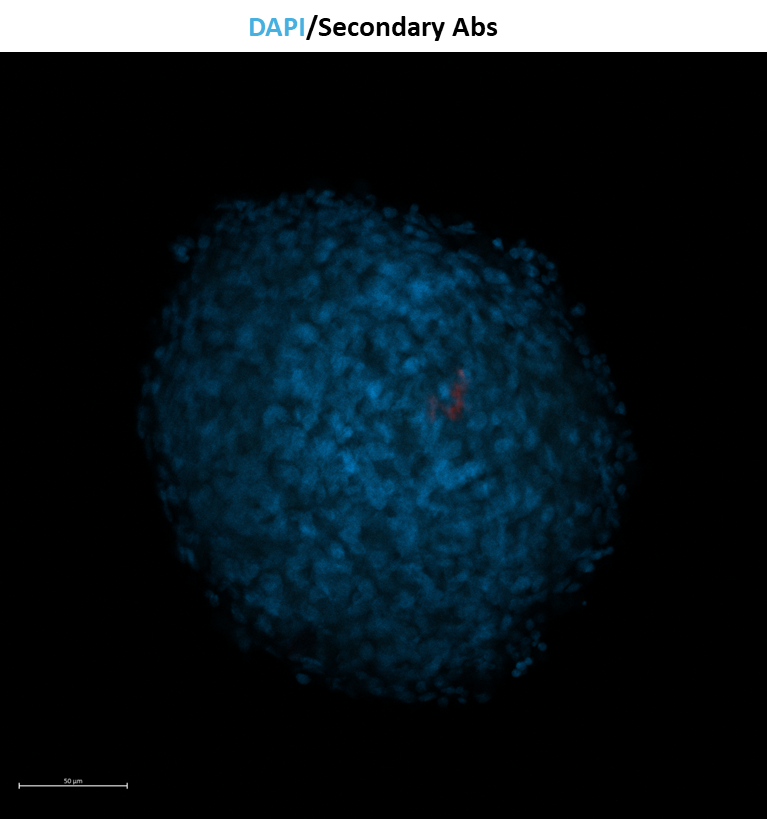


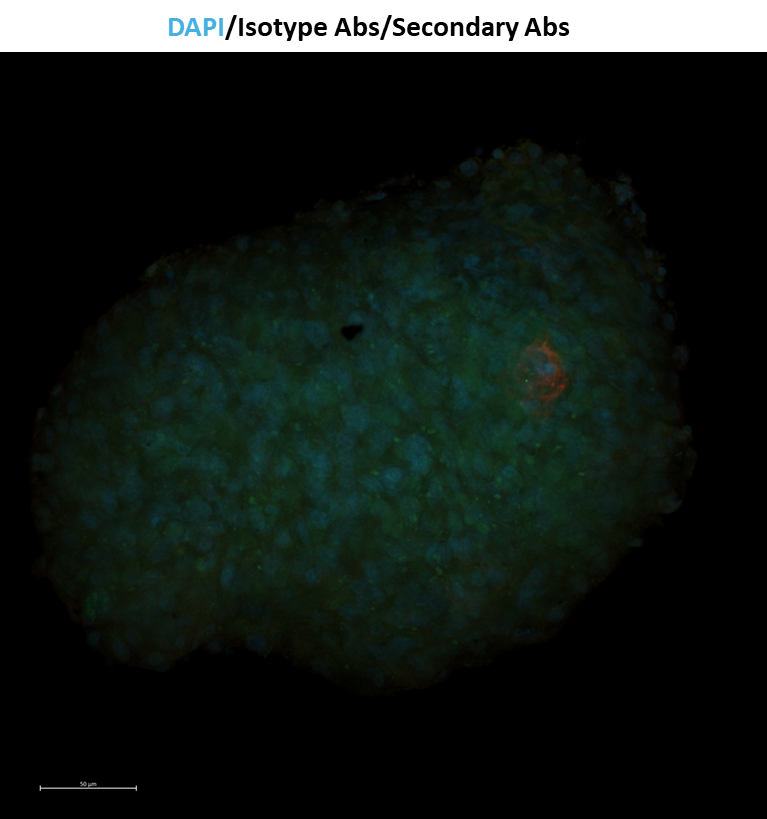

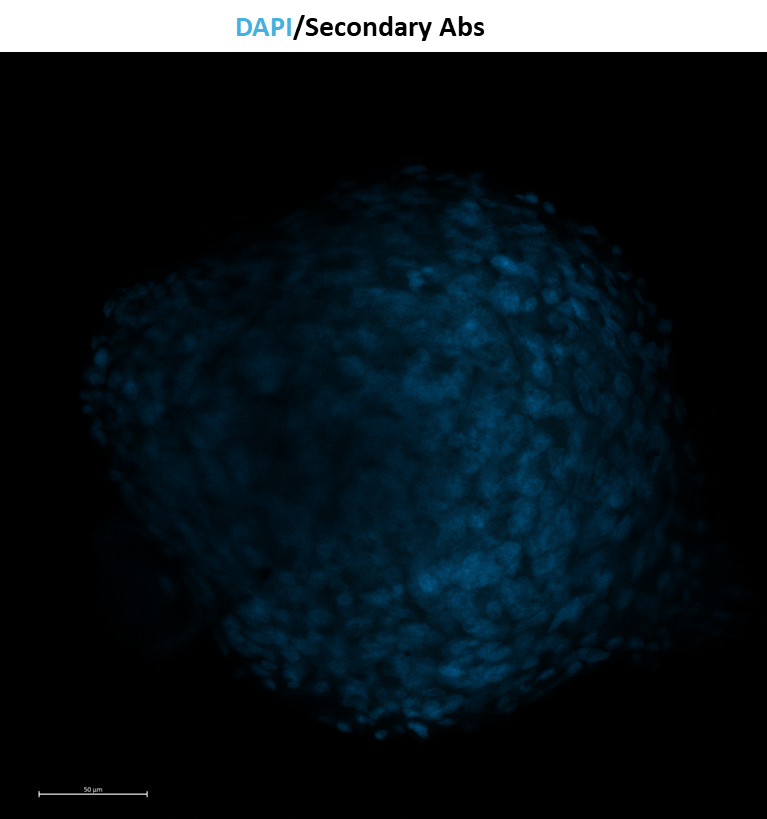


**Supplementary Figure 4:** Immunofluorescence staining of cardiomyocyte and cardiomyocyte/cardiac fibroblast spheroids with isotype IgG Abs, secondary antibodies, and DAPI captured with a 10×/0.3 NA (dry) lens.


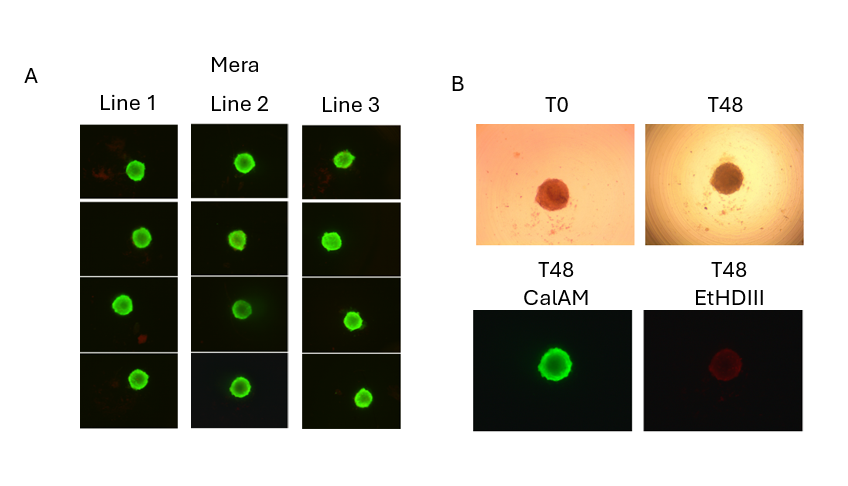


**Supplementary Figure 5:** Representative images of Cardiomyocyte spheroids A) in three fluidic lines within Mera after 48h. Spheroids were stained in Mera with 2 µM Calcein-AM and imaged offline using an Olympus IX70 microscope. B) Representative brightfield and fluorescence images of cardiomyocyte spheroids taken at 0 and 48h and stained with 2 µM Calcein-AM and 10 µM EtHDIII.
